1 **Dissection and validation of minor quantitative trait loci (QTLs)**  
2 **conferring grain size and weight in rice**

3 Ping Sun<sup>1</sup>, Yuanyuan Zheng<sup>1</sup>, Pingbo Li, Hong Ye, Hao Zhou, Guanjun Gao, Yuqing

4 He<sup>2</sup>

5 National Key Laboratory of Crop Genetic Improvement and National Center of Crop

6 Molecular Breeding, Huazhong Agricultural University, Wuhan 430070, China.

7 <sup>1</sup>These authors contributed equally to this work.

8 <sup>2</sup>Corresponding author.

9

10 **E-mail:**

11 Ping Sun: [sunping121605@163.com](mailto:sunping121605@163.com)

12 Yuanyuan Zheng: [yuanyuanzh1005@163.com](mailto:yuanyuanzh1005@163.com)

13 Pingbo Li: [lipingboxwmr@126.com](mailto:lipingboxwmr@126.com)

14 Hong Ye: [19881212hong@163.com](mailto:19881212hong@163.com)

15 Hao Zhou: [zhouhao@webmail.hzau.edu.cn](mailto:zhouhao@webmail.hzau.edu.cn)

16 Guanjun Gao: [gaojun8199@webmail.hzau.edu.cn](mailto:gaojun8199@webmail.hzau.edu.cn)

17 Yuqing He: [yqhe@mail.hzau.edu.cn](mailto:yqhe@mail.hzau.edu.cn)

18

19

20

21

22

23 **Abstract**

24 Grain size and weight contribute greatly to the grain yield of rice. In order to identify  
25 minor QTLs conferring grain size and weight, an F<sub>2</sub> population derived from a cross  
26 between two *indica* rice lines showing small difference on grain size, Guangzhan  
27 63-4S (GZ63-4S) and Dodda, and its derived F<sub>2:3</sub> population were developed and used  
28 for QTL analysis. Totally, 36 QTLs for grain size and weight were detected, and 7  
29 were repeatedly detected, of which the number of beneficial alleles was contributed  
30 roughly equally by the two parents. In order to further validate effects of QTLs  
31 detected, a BC<sub>1</sub>F<sub>2</sub> population derived from a backcross of a mixture of F<sub>2</sub> lines with  
32 GZ63-4S was developed and subjected to QTL selection. Heterozygous regions of 3  
33 QTLs, *qGS3*, *qTGW6.2* and *qGT7* were identified, and corresponding near-isogenic  
34 lines (NILs) of each QTL were constructed with three rounds of self-crosses. In the  
35 background of NILs, *qGS3* was responsible for GL, LWR, GT and TGW, *qTGW6.2*  
36 was for GL and TGW, and *qGT7* was for GT and TGW. These results have laid the  
37 foundation of further fine mapping and cloning of underlying genes, and could be of  
38 great use in breeding and improvement of rice lines with desirable size and yield.

39 **Keywords:** grain size, grain weight, minor QTL, validation, NIL, rice

40

41

42

43

44

## 45 **Introduction**

46 Rice is one of the staple crops worldwide, and feeds more than half of the world's  
47 population. In the face of continuously increasing population and reduced arable land,  
48 how to further improve the grain yield of rice is a major concern of scientists and  
49 breeders. Grain size, characterized by four factors viz., grain length (GL), grain width  
50 (GW), length-to-width ratio (LWR) and grain thickness (GT), contributes greatly to  
51 grain weight, which is a key determinant of grain yield [1]. Therefore, dissection of  
52 the genetic basis that underlies grain size and weight would be of great use in  
53 developing rice lines with high grain yield.

54 Considerable efforts have been made to investigate the genetic basis of grain size and  
55 weight in the past two decades, and results showed that the four factors of grain size,  
56 GL, GW, LWR and GT, and thousand-grain weight (TGW) are quantitative traits, and  
57 subjected to control of many genes [2, 3]. Up to now, large numbers of quantitative  
58 trait loci (QTLs) have been identified, however, only a small proportion of QTLs  
59 displaying large effect have been cloned, such as *GS3* [4, 5], *OsMADS1* [6, 7],  
60 *GL3.3/TGW3* [8-10], *GW5/GSE5* [11, 12], *GS5* [13], *GW8* [14], *GS2/GL2* [15-17],  
61 *GL7/GW7* [18, 19], etc. Although the knowledge of molecular regulation of grain size  
62 and weight has greatly increased, the mining and cloning of more QTLs, especially  
63 minor QTLs, is still of great importance to have a better understanding of underlying  
64 mechanisms and provide breeding programs with valuable gene resources.

65 Rice lines displaying large difference on grain size and weight were always selected  
66 to develop segregating populations for QTL analysis, which resulted in the repeated

67 detection of several major QTLs/genes. For example, two major genes for grain size,  
68 *GW2* and *GL3.1* were identified and cloned from genetic populations derived from  
69 FAZ1 and WY3, of which the TGW values differ by 23.12g [20, 21]. The two genes  
70 above, together with another two major genes, *GS3* and *GW5/GSE5*, contributed to  
71 the huge variation of grain size and weight between N411 and N643, of which the  
72 TGW values differ by 54.33g [22]. The existence of major genes is likely to interfere  
73 the mapping and validation of minor QTLs, exemplified by the fine mapping of *GS5*  
74 [13]. Therefore, in order to identify minor QTLs for grain size and weight, rice lines  
75 displaying small difference should be preferred.

76 Quantitative traits are easily affected by environment, which leads to the instability of  
77 QTL detection. Therefore, genetic validation of QTLs is of great necessity in further  
78 breeding utilization or cloning. The most frequently used method is evaluation the  
79 effect of a QTL using near-isogenic lines (NILs), which are lines that carry  
80 segregating regions at target QTL but homozygous regions in the rest of genome [23].  
81 NILs for a QTL are always developed by backcrossing lines carrying the QTL region  
82 from donor to the receipt several times until the non-target QTL regions were  
83 completely from the receipt, which could achieve the simultaneous improvement of  
84 target traits of recipient [24, 25]. Another simple method is to select lines carrying  
85 segregating target QTL regions from inbred populations that have undertaken several  
86 rounds of self-crosses, also known as residual heterozygous lines (RHLs) [26, 27].  
87 This method is sometimes utilized for absence of laborious hybridization work. The  
88 NIL of *Ghd8*, a major QTL with pleiotropic effects on grain yield, heading date and

89 plant height, was constructed by screening lines carrying segregation target regions  
90 from a RIL population of the F<sub>7</sub> generation [28, 29].

91 In this study, in order to identify minor QTLs for grain size, two *indica* rice lines  
92 displaying small difference, Guangzhan 63-4S (GZ63-4S) and Dodda were selected to  
93 develop the F<sub>2</sub> and derived F<sub>2:3</sub> populations, and QTL analysis of grain size and  
94 weight were performed. In order to validate QTL detected, lines carrying  
95 heterozygous QTL regions were screened from a BC<sub>1</sub>F<sub>2</sub> population derived from a  
96 backcross of a mixture of F<sub>2</sub> lines with GZ63-4S. NILs of three QTLs were developed  
97 by a series of self-crosses of screened BC<sub>1</sub>F<sub>2</sub> lines, and further used for evaluation  
98 their genetic effect on grain size and TGW.

99

## 100 **Materials and methods**

### 101 Population development and cultivation

102 Guangzhan 63-4S (GZ63-4S) is a leading *indica* two-line male sterile line developed  
103 by the China North Japonica Hybrid Rice Research Center and Hefei Fengle Seed  
104 Company, and has been mated with many restorer lines to produce promising hybrid  
105 combinations in recent years [30]. Dodda is an *indica* cultivar with unknown origin,  
106 belonging to the core germplasm collections of our lab. The TGW values of GZ63-4S  
107 and Dodda differ by less than 10 g (data not shown).

108 As displayed in Fig.1, 1000 F<sub>2</sub> lines were produced from a cross between GZ63-4S  
109 and Dodda, and were subjected to selection of the *TMS5* locus conditioning  
110 thermo-sensitive genic male sterility with a closely linked marker [31]. 214 lines

111 carrying homozygous *TMS5* regions were selected to make up the F<sub>2</sub> mapping  
112 population, which was further self-crossed to produce the F<sub>2:3</sub> population. Both the F<sub>2</sub>  
113 and F<sub>2:3</sub> population was exploited to map QTLs for grain size and TGW. In addition,  
114 1200 BC<sub>1</sub>F<sub>2</sub> lines were produced by backcrossing a mixture of F<sub>2</sub> lines to GZ63-4S,  
115 followed by a self-cross. These lines were subjected to *TMS5* selection, and 250 lines  
116 carrying homozygous *TMS5* regions were selected to perform heterozygous QTL  
117 regions screening with flanking makers in the mapping process (Table 2). BC<sub>1</sub>F<sub>2</sub> lines  
118 carrying heterozygous QTL regions were further self-crossed three times to produce  
119 the BC<sub>1</sub>F<sub>5</sub> populations, which were utilized to validate the effect of QTLs.

120 The F<sub>2</sub>, F<sub>2:3</sub> and BC<sub>1</sub>F<sub>5</sub> populations were planted in year 2014, 2015 and 2018,  
121 respectively, during the normal rice growing seasons at the Experimental Farm of  
122 Huangzhong Agricultural University in Wuhan, China. Each F<sub>3</sub> line consisted of 12  
123 plants, and each BC<sub>1</sub>F<sub>5</sub> population consisted of 100 plants.

124

125 Trait evaluation

126 GL, GW, LWR and TGW were measured with more than 200 grains per line or plant  
127 using the yield traits scorer [32]. GT was determined for each grain individually using  
128 an electronic digital caliper (Guanglu Measuring Instrument Co. Ltd., China), and  
129 thirty grain values were averaged for each line or plant. For the F<sub>2:3</sub> population, the  
130 phenotypic value of each line was the average value of 12 plants.

131

132 Genetic map construction

133 A total of more than 1000 simple sequence repeat markers or insert/deletion markers  
134 were employed to screen for polymorphic markers between GZ63-4S and Dodda, and  
135 143 markers were identified. Among that, 111 markers were selected to perform  
136 genotyping of the F<sub>2</sub> population with 4% polyacrylamide gels migration and silver  
137 staining [33]. A genetic linkage map was constructed using MapMaker/Exp3.0 with  
138 the Kosambi mapping function [34].

139

140 Data analysis

141 Correlation analysis was performed using the data analysis module in Microsoft  
142 Office Excel 2016. QTL analysis was performed by composite interval mapping using  
143 the software package QTLCartographer V2.5 with a logarithm of odds (LOD)  
144 threshold of 3.0 [35]. ANNOVA analysis was performed using the IBM SPSS  
145 Statistics 22.

146

## 147 **Results**

148 Phenotypic variation and correlation of the F<sub>2</sub> and F<sub>2:3</sub> populations

149 GZ63-4S is a typical photoperiod- and thermo-sensitive genic male sterile line, and  
150 shows male sterility in the normal growing seasons in Wuhan. Therefore, the seeds  
151 could not be harvested, which abolished comparison of grain size and TGW between  
152 the two parents. All the five traits of the F<sub>2</sub> and F<sub>2:3</sub> populations showed continuous  
153 variation and followed normal distribution in year 2014 and 2015, respectively (Fig.  
154 2).

155 All the four grain size factors were significantly positively correlated with TWG in  
156 both years, except for LWR (Table 1). GL was significantly positively correlated with  
157 LWR and GT in both years, while GW was only significantly negatively correlated  
158 with LWR in both years. The three highest correlation coefficients were observed  
159 between GW and TGW in year 2014, GL in two years, and GW and LWR in year  
160 2014, with values of 0.739, 0.731 and 0.728, respectively.

161

162 QTLs detected in the  $F_2$  and  $F_{2:3}$  populations

163 GL

164 Ten QTLs for GL were detected in two populations and distributed on seven  
165 chromosomes, with phenotypic variation explained by each QTL ranging from 2.58%  
166 to 25.39% (Table 2, Fig.3). Among those, the beneficial alleles of *qGL3*, *qGL4.1* and  
167 *qGL4.2* were from GZ63-4S, while that of others were from Dodda. Two QTLs,  
168 *qGL3* and *qGL6* were repeatedly detected, and explained 2.58% and 13.71% of the  
169 variation in the  $F_2$  population, and 8.12% and 7.41% of the variation in the  $F_{2:3}$   
170 population, respectively. The remaining QTLs were detected only in the  $F_{2:3}$   
171 population, excluding *qGL4.1*.

172 GW

173 Five QTLs were detected for GW in the  $F_{2:3}$  population, while none in the  $F_2$   
174 population (Table 2, Fig.3). Among those, the beneficial alleles of two were from  
175 GZ63-4S, while that of the other three were from Dodda.

176 LWR



177 Five QTLs for LWR were identified in the two populations, and distributed on four  
178 chromosomes (Table 2, Fig.3). Among those, two QTLs, *qLWR3* and *qLWR9*, were  
179 repeatedly detected, and displayed nearly the same values of additive effect in  
180 opposite direction. The remaining were minor QTLs accounting for less than 6% of  
181 the variation and were detected only in one population.

182 GT

183 Seven QTLs were identified for GT in the two populations and were distributed on  
184 chromosome 2, 3, 4, 7 and 11 (Table 2, Fig.3). The beneficial allele of all eight QTLs  
185 were from GZ63-4S, except for that of *qGT11*. The three QTLs, *qGT3*, *qGT7* and  
186 *qGT11* were stably detected, and explained 15.16%, 6.60% and 5.83% of the variation  
187 in the F<sub>2</sub> population, and 20.98%, 10.25% and 6.24% of the variation in the F<sub>2:3</sub>  
188 population, respectively. *qGT2.1* and *qGT2.2* were only detected in the F<sub>2:3</sub>  
189 population, while *qGT7* and *qGT11* were only in the F<sub>2</sub> population.

190 TGW

191 Nine QTLs for TGW were detected in the two populations, which were distributed on  
192 chromosome 2, 3, 4, 6, 7 and 11 (Table 2, Fig.3). Among those, four QTLs, *qTGW3*,  
193 *qTGW4*, *qTGW6.2* and *qTGW11*, were repeatedly detected, which accounted for  
194 0.83%, 15.76%, 6.89% and 20.68% of the variation in the F<sub>2</sub> population, and 3.90%,  
195 12.03%, 5.11% and 10.98% of the variation in the F<sub>2:3</sub> population, respectively. The  
196 beneficial alleles of *qTGW3* and *qTGW4* were from GZ63-4S, while that of *qTGW6.2*  
197 and *qTGW11* were from Dodda. The remaining QTLs were all only detected in the  
198 F<sub>2:3</sub> population.

199 The region flanked by marker LRJ99 and RM232 on chromosome 3 and consisting of  
200 four QTLs, was responsible for GL, LWR, GT and TGW in both the F<sub>2</sub> and F<sub>2:3</sub>  
201 population, and was term *qGS3*, hereafter.

202

203 Validation of QTL effects using NILs

204 In the BC<sub>1</sub>F<sub>2</sub> population derived from backcrossing some F<sub>2</sub> lines with GZ63-4S,  
205 heterozygous regions were screened for QTLs repeatedly detected in both the F<sub>2</sub> and  
206 F<sub>2:3</sub> populations or QTLs accounting for more that 10% of variation in one population  
207 using flanked markers (Fig.2, Table 1). Lines carrying heterozygous regions of three  
208 QTLs, *qGS3*, *qTGW6.2* and *qGT7*, were identified respectively, and were self-crossed  
209 three times to produce NIL populations for each QTL.

210 In the NIL population of *qGS3*, significant differences were observed in the average  
211 values of GL, GT and TGW among the three genotypes, *qGS3<sup>Dodda</sup>*, *qGS3<sup>H</sup>* and  
212 *qGS3<sup>GZ63-4S</sup>* (Table 3). Compared to NIL (*qGS3<sup>Dodda</sup>*), NIL (*qGS3<sup>GZ63-4S</sup>*) showed  
213 increased values by 0.21 mm in GL, 0.10 in LWR, 0.07mm in GT and 1.47g in TGW.

214 For *qTGW6.2*, significant differences were observed in the average values of GL and  
215 TGW between *qTGW6.2<sup>Dodda</sup>* and *qTGW6.2<sup>GZ63-4S</sup>*, while no difference between  
216 *qTGW6.2<sup>H</sup>* and *qTGW6.2<sup>GZ63-4S</sup>* in the NIL population (Table 4). Compared to NIL  
217 (*qTGW6.2<sup>Dodda</sup>*), NIL (*qTGW6.2<sup>GZ63-4S</sup>*) showed decreased values by 0.14 mm in GL  
218 and 1.24g in TGW.

219 For *qGT7*, significant differences were observed in the average values of GT among  
220 the three genotypes, *qGT7<sup>Dodda</sup>*, *qGT7<sup>H</sup>* and *qGT7<sup>GZ63-4S</sup>*, and in that of TGW between

221 *qGT7<sup>Dodda</sup>* and *qGT7<sup>GZ63-4S</sup>* in the NIL population (Table 5). Compared to NIL  
222 (*qGT7<sup>Dodda</sup>*), NIL (*qGT7<sup>GZ63-4S</sup>*) showed increased values by 0.07 mm in GT and 1.27g  
223 in TGW.

224

## 225 **Discussion**

226 Evaluation of grain size and weight

227 Genotyping and phenotyping are two key processes in genetic analysis. With the  
228 completion of high-quality genome sequences of several rice cultivars and  
229 development of sequencing techniques, genotyping a population is becoming  
230 increasingly simple and cheap [36, 37]. Therefore, high-throughput and time-saving  
231 methods of phenotyping are in urgent need. In previous studies, grain size was always  
232 evaluated using electronic digital-display vernier caliper, and about 30 randomly  
233 chosen filled grains was used for each line, which is both pains taking and time  
234 consuming [19, 38]. *SmartGrain* is a phenotyping software developed for measuring  
235 grain size through image analysis, which improved greatly the throughput, but is still  
236 time consuming for the separation of adjacent seeds in the scanning process [39]. In  
237 this study, evaluation of GL, GW, LWR, and TGW was performed using the yield  
238 traits scorer (YTS) that could fulfil the measurement of a rice line represented by  
239 about 500 seeds within one minute [28]. Therefore, the YTS dramatically increases  
240 the amount of seeds evaluated and reduces the time of phenotyping, demonstrating its  
241 great power in phenotype evaluation.

242

243 Minor QTLs for grain size and weight

244 In this study, a total of 37 QTLs were identified for GL, GW, LWR, GT and TGW in  
245 the F<sub>2</sub> and F<sub>2:3</sub> populations, and 7 QTL regions were repeatedly detected, of which the  
246 additive effects were far less than that of cloned major genes for grain size, such as  
247 *GS3*, *GL3.1/qGL3*, *GW5/GSE5* and *GW2* [4, 5, 11, 12, 20-22], demonstrating minor  
248 QTLs for grain size and weight. Moreover, the number of beneficial alleles was  
249 contributed roughly equally by the two parents, indicating that novel minor QTLs  
250 could be detected from rice lines that differ little in grain size.

251 Among QTLs detected, *qGS3*, the pleiotropic QTL for GL, LWR, GT and TGW on  
252 chromosome 3, is co-located with *OsMADS1*, of which a natural allele was reported  
253 responsible for GL, GT and TGW in two separate studies [6, 7]. However, the  
254 difference of GL between the two NILs in Yu et al. (2018) was almost twice that  
255 between our NILs, while the difference of GT was the same [7]. An appropriate  
256 explanation is that another gene for GL in the Nipponbare background may interact  
257 with *OsMADS1* to amplify the difference in the NILs, as reported by Xia et al. (2018)  
258 [9]. Therefore, *qGS3* is likely to be *OsMADS1*. In addition, the region of *qTGW6.2*  
259 overlaps with that of two QTLs for TGW in the chromosomal segment substitution  
260 lines (CSSLs) population derived from Yamadanishiki or Takanari in the background  
261 of Koshihikari, respectively [40, 41]. *qGT7*, the QTL for GT on chromosome 7, is  
262 co-located with a region for GL, GW, LWR and GT reported by Liu et al (2015),  
263 which contains *GL7/GW7*, a major gene influencing GL and GW simultaneously [18,  
264 19, 42]. As *qGT7* has no effect on GL and GW in the NIL background, it is a novel

265 gene different from *GL7/GW7*. The region of *qLWR9* was also detected for LWR only  
266 by Yin et al. (2015) [43]. The remaining QTLs are seldom reported, or maybe novel.

267

268 Validation of minor QTLs using NILs

269 QTLs detected in primary populations are sometimes unstable, and thus should be  
270 further validated, especially for minor QTLs. The best way to validate QTLs is the use  
271 of NILs. In this study, lines carrying heterozygous QTL regions were screened from  
272 the BC<sub>1</sub>F<sub>2</sub> population, in case of the loss of target regions in subsequent self-crosses.  
273 Then, selected lines were subjected to three rounds of self-crosses, in order to reduce  
274 the heterozygosity of non-target regions. The method we preferred ensures that NILs  
275 for QTLs of interest are constructed, and eliminates laborious hybridization work.

276 In this study, the NILs of three QTLs, *qGS3*, *qTGW6.2* and *qGT7*, were constructed,  
277 and effects on grain size and TGW were evaluated. The beneficial alleles of *qGS3*  
278 from GZ63-4S could increase the value by 0.21mm in GL, 0.07mm in GT, and 1.47g  
279 in TGW in homozygous NILs, which was consistent with the values of additive effect  
280 in the F<sub>2</sub> and F<sub>2:3</sub> population on the whole (Table 2, Table 3), suggesting that *qGS3* is  
281 a stable and pleiotropic QTL for GL, GT and TGW. *qTGW6.2* was initially detected  
282 as a QTL for TGW, but was validated to have effect on both GL and TGW in the NIL  
283 population and act in a dominant manner (Table 4). The failure in detection of  
284 *qTGW6.2* on GL in F<sub>2</sub> and F<sub>2:3</sub> population may be attributed to the complexity of  
285 genome background and the low variation explained, which further supported the  
286 necessity of validation of QTLs using NILs. *qGT7* was repeatedly confirmed as a

287 QTL for GT, and had no effect on GL and GW in the F<sub>2</sub>, F<sub>2:3</sub>, and NIL populations  
288 (Table2, Table 5). Being one of the four factors of grain size, GT has received less  
289 attention, and several cloned genes conditioning GT are responsible for GL and/or  
290 GW at the same time, such as *GS2*, *GW8* [17, 44]. Therefore, *qGT7* is a good  
291 candidate for further research of the molecular mechanism underlying GT.

292

293 Improvement of grain size, quality and yield in rice

294 Grain size contributes to not only grain yield, but also grain quality, especially  
295 appearance quality and milling quality [45 46]. Abundant variation of grain size is  
296 observed in rice germplasm cultivated worldwide, thus providing valuable resources  
297 for breeding or improvement of rice grain with desirable size and yield. QTLs or  
298 genes for grain size mined from germplasm resources have been or are being  
299 exploited in rice breeding programs. The *gs3* allele and *GW5* allele from 93-11,  
300 together with beneficial alleles controlling fine eating and cooking quality from  
301 Nipponbare, were introduced into the Teqing background, and the resulting lines  
302 displayed dramatic improvement in grain size and quality [47]. The *gs3* allele and the  
303 *GW7* allele from TFA were pyramided into the background of HJX74, resulting in  
304 simultaneously improvement of grain yield and quality [18]. In this study, seven QTL  
305 regions were repeated detected in both the F<sub>2</sub> and F<sub>2:3</sub> populations, and three of them  
306 were further validated in the NIL background, demonstrating the reality and stability  
307 these QTLs. *qGL6* and *qTGW6.2*, the two QTLs for GL located on chromosome 6,  
308 could be used in improvement of GL and KGW of GZ63-4S with the beneficial

309 alleles from Dodda, and further in improvement of the yield and quality performance  
310 of hybrid combinations using GZ63-4S as the maternal parent. In addition, the QTLs  
311 detected in this study, together with QTLs or genes in other studies, could be  
312 combined in the breeding and improvement of rice grains with desirable size, quality  
313 and yield.

314

### 315 **Acknowledgement**

316 This work was supported by grants from the National Program on R&D of  
317 Transgenic Plants (2016ZX08009003-004, 2016ZX08001002-002), and the  
318 earmarked fund for the China Agriculture Research System (CARS-01-03) of  
319 China.

320

### 321 **Competing interests**

322 The authors declare that they have no competing financial interests.

323

### 324 **Author contributions**

325 Ping Sun and Yuanyuan Zheng performed most of experiments and analyzed the data.  
326 Pingbo Li wrote the paper. Hong Ye and Hao Zhou constructed the F<sub>2</sub> mapping  
327 population. Guanjun Gao participated in the field management. Yuqing He designed  
328 and supervised the study.

329

### 330 **Reference**

- 331 1. Xing YZ, Zhang QF (2010) Genetic and molecular bases of rice yield. *Annu Rev*  
332 *Plant Biol* 61:421-442
- 333 2. Huang RY, Jiang LR, Zheng JS et al (2013) Genetic bases of rice grain shape: so  
334 many genes, so little known. *Trends Plant Sci* 18:218-226
- 335 3. Zuo JR, Li JY (2014) Molecular genetic dissection of quantitative trait loci  
336 regulating rice grain size. *Annu Rev Genet* 48:99-118
- 337 4. Fan CH, Xing YZ, Mao HL et al (2006) *GS3*, a major QTL for grain length and  
338 weight and minor QTL for grain width and thickness in rice, encodes a putative  
339 transmembrane protein. *Theor Appl Genet* 112:1164-1171
- 340 5. Takano-Kai N, Jiang H, Kubo Y et al (2009) Evolutionary history of *GS3*, a gene  
341 conferring grain length in rice. *Genetics* 182:1323-1334
- 342 6. Liu Q, Han RX, Wu K et al. (2018) G-protein  $\beta\gamma$  subunits determine grain size  
343 through interaction with MADS-domain transcription factors in rice. *Nat Commun*  
344 9: 852
- 345 7. Yu JP, Miao JL, Zhang ZY et al (2018) Alternative splicing of *OsLG3b* controls  
346 grain length and yield in *japonica* rice. *Plant Biotechnol J* 16:1667-1678
- 347 8. Hu ZJ, Lu SJ, Wang MJ et al (2018) A novel QTL *qTGW3* encodes the  
348 GSK3/SHAGGY-like kinase OsGSK5/OsSK41 that interacts with OsARF4 to  
349 negatively regulate grain size and weight in rice. *Mol Plant* 11:736-749
- 350 9. Xia D, Zhou H, Liu RJ et al (2018) *GL3.3*, a novel QTL encoding a  
351 GSK3/SHAGGY-like kinase, epistatically interacts with *GS3* to produce  
352 extra-long grains in rice. *Mol Plant* 11:754-756



- 353 **10.** Ying JZ, Ma M, Bai C et al (2018) *TGW3*, a major QTL that negatively modulates  
354 grain length and weight in rice. *Mol Plant* 11:750-753
- 355 **11.** Duan PG, Xu JS, Zeng DL et al (2017) Natural variation in the promoter of *GSE5*  
356 contributes to grain size diversity in rice. *Mol Plant* 10:685-694
- 357 **12.** Liu JF, Chen J, Zheng XM et al (2017) *GW5* acts in the brassinosteroid signalling  
358 pathway to regulate grain width and weight in rice. *Nat Plants* 3:17043
- 359 **13.** Li YB, Fan CC, Xing YZ et al (2011) Natural variation in *GS5* plays an important  
360 role in regulating grain size and yield in rice. *Nat Genet* 43:1266-1269
- 361 **14.** Wang SK, Wu K, Yuan QB et al (2012) Control of grain size, shape and quality  
362 by *OsSPL16* in rice. *Nat Genet* 44:950-954
- 363 **15.** Che RH, Tong HN, Shi BH et al (2015) Control of grain size and rice yield by  
364 *GL2*-mediated brassinosteroid responses. *Nat Plants* 2:15195
- 365 **16.** Duan PG, Ni S, Wang JM et al (2015) Regulation of *OsGRF4* by *OsmiR396*  
366 controls grain size and yield in rice. *Nat Plants* 2:15203
- 367 **17.** Hu J, Wang YX, Fang YX et al (2015) A rare allele of *GS2* enhances grain size  
368 and grain yield in rice. *Mol Plant* 8:1455-1465
- 369 **18.** Wang SK, Li S, Liu Q et al (2015) The *OsSPL16-GW7* regulatory module  
370 determines grain shape and simultaneously improves rice yield and grain quality.  
371 *Nat Genet* 47:949-954
- 372 **19.** Wang YX, Xiong GS, Hu J et al (2015) Copy number variation at the *GL7* locus  
373 contributes to grain size diversity in rice. *Nat Genet* 47:944-948
- 374 **20.** Song XJ, Huang W, Shi M, Zhu MZ, Lin HX (2007) A QTL for rice grain width

- 375 and weight encodes a previously unknown RING-type E3 ubiquitin ligase. Nat  
376 Genet 39:623-630
- 377 **21.** Qi P, Lin YS, Song XJ et al (2012) The novel quantitative trait locus *GL3.1*  
378 controls rice grain size and yield by regulating Cyclin-T1;3. Cell Res  
379 22:1666-1680
- 380 **22.** Zhang XJ, Wang JF, Huang J et al (2012) Rare allele of *OsPPKL1* associated with  
381 grain length causes extra-large grain and a significant yield increase in rice. P Natl  
382 Acad Sci USA 109:21534-21539
- 383 **23.** Yano M, Sasaki T (1997) Genetic and molecular dissection of quantitative traits in  
384 rice. Plant Mol Biol 35:145-153
- 385 **24.** Xiao C, Hu J, Ao YT et al (2016) Development and evaluation of near-isogenic  
386 lines for brown planthopper resistance in rice cv. 9311. Sci Rep 6: 38159
- 387 **25.** Zhou RH, Zhu ZD, Kong XY et al (2005) Development of wheat near-isogenic  
388 lines for powdery mildew resistance. Theor Appl Genet 110:640-648
- 389 **26.** Darvasi A, Soller M (1995) Advanced intercross lines, an experimental population  
390 for fine genetic mapping. Genetics 141:1199-1207
- 391 **27.** Tuinstra MR, Ejeta G, Goldsbrough PB (1997) Heterogeneous inbred family  
392 (HIF) analysis: a method for developing near-isogenic lines that differ at  
393 quantitative trait loci. Theor Appl Genet 95:1005-1011
- 394 **28.** Yan WH, Wang P, Chen HX et al (2011) A major QTL, *Ghd8*, plays pleiotropic  
395 roles in regulating grain oroductivity, plant height, and heading date in rice. Mol  
396 Plant 4:319-330

- 397 **29.** Zhang YS, Luo LJ, Xu CG, Zhang QF, Xing YZ (2006) Quantitative trait loci for  
398 panicle size, heading date and plant height co-segregating in trait-performance  
399 derived near-isogenic lines of rice (*Oryza sativa*). Theor Appl Genet 113:361-368
- 400 **30.** Shen QW, Jiang H (2014) Performance of male sterile line Guangzhan 63-4S on  
401 breeding and its enlightenment of Hubei middle rice. Hubei Agricultural Sciences  
402 53: 2490-2492 (Chinese with English abstract)
- 403 **31.** Zhou H, Zhou M, Yang YZ et al (2014) RNase Z<sup>S1</sup> processes *Ubl40* mRNAs and  
404 controls thermosensitive genic male sterility in rice. Nat Commun 5: 4884
- 405 **32.** Yang WN, Guo ZL, Huang CL et al (2014) Combining high-throughput  
406 phenotyping and genome-wide association studies to reveal natural genetic  
407 variation in rice. Nat Commun 5: 5087
- 408 **33.** Panaud O, Chen X, McCouch SR (1996) Development of microsatellite markers  
409 and characterization of simple sequence length polymorphism (SSLP) in rice  
410 (*Oryza sativa* L.). Mol Gen Genet 252:597-607
- 411 **34.** Lincoln SE, Daly MJ and Lander ES (1992) Constructing genetic maps with  
412 MAPMAKER/EXP3.0. Whitehead Institute Technical Report, Whitehead  
413 Institute, Cambridge
- 414 **35.** Wang SC, Christopher JB and Zeng ZB (2012) Windows QTL Cartographer 2.5.  
415 Department of Statistics, North Carolina State University, Raleigh, NC
- 416 **36.** Huang XH, Lu TT, Han B (2013) Resequencing rice genomes: an emerging new  
417 era of rice genomics. Trends Genet 29:225-232
- 418 **37.** Xie WB, Feng Q, Yu HH et al (2010) Parent-independent genotyping for

- 419        constructing an ultrahigh-density linkage map based on population sequencing. P  
420        Natl Acad Sci USA 107:10578-10583
- 421    **38.** Sun L, Ma DP, Yu HH et al (2013) Identification of quantitative trait loci for grain  
422        size and the contributions of major grain-size QTLs to grain weight in rice. Mol  
423        Breeding 31:451-461
- 424    **39.** Tanabata T, Shibaya T, Hori K, Ebana K, Yano M (2012) SmartGrain:  
425        High-throughput phenotyping software for measuring seed shape through image  
426        analysis. Plant Physiol 160:1871-1880
- 427    **40.** Okadao S, Onogi A, Iijima K et al (2018) Identification of QTLs for rice grain  
428        size using a novel set of chromosomal segment substitution lines derived from  
429        Yamadanishiki in the genetic background of Koshihikari. Breeding Sci  
430        68:210-218
- 431    **41.** Takai T, Ikka T, Kondo K et al (2014) Genetic mechanisms underlying yield  
432        potential in the rice high-yielding cultivar Takanari, based on reciprocal  
433        chromosome segment substitution lines. BMC Plant Biol 14:295
- 434    **42.** Liu DL, Kang MH, Wang F et al (2015) Mapping of the genetic determinant for  
435        grain size in rice using a recombinant inbred line (RIL) population generated from  
436        two elite *indica* parents. Euphytica 206:159-173
- 437    **43.** Yin CB, Li HH, Li SS, Xu LD, Zhao ZG, Wang JK (2015) Genetic dissection on  
438        rice grain shape by the two-dimensional image analysis in one *japonica* x *indica*  
439        population consisting of recombinant inbred lines. Theor Appl Genet  
440        128:1969-1986

- 441 **44.** Gao FY, Luo ZL, Ren JS et al (2015) Fine mapping and candidate gene analysis  
 442 of *qGT8*, a major QTL for grain thickness in rice. *Sci Agric Sin* 48:4859-4871
- 443 **45.** Fitzgerald MA, McCouch SR, Hall RD (2009) Not just a grain of rice: the quest  
 444 for quality. *Trends Plant Sci* 14:133-139
- 445 **46.** Zheng TQ, Xu JL, Li ZK, Zhai HQ, Wan JM (2007) Genomic regions associated  
 446 with milling quality and grain shape identified in a set of random introgression  
 447 lines of rice (*Oryza sativa* L.). *Plant Breeding* 126:158-163
- 448 **47.** Zeng DL, Tian ZX, Rao YC et al (2017) Rational design of high-yield and  
 449 superior-quality rice. *Nat Plants* 3: 17031

450

451 Table 1 Correlations of GL, GW, LWR, GT and TGW of the F<sub>2</sub> and F<sub>2,3</sub> populations  
 452 in year 2014 and 2015

|       | GL14    | GL15    | GW14     | GW15     | LWR14   | LWR15 | GT14    | GT15    | TGW14   | TGW15 |
|-------|---------|---------|----------|----------|---------|-------|---------|---------|---------|-------|
| GL14  |         |         |          |          |         |       |         |         |         |       |
| GL15  | 0.731** |         |          |          |         |       |         |         |         |       |
| GW14  | 0.157   | 0.055   |          |          |         |       |         |         |         |       |
| GW15  | 0.046   | 0.139   | 0.489**  |          |         |       |         |         |         |       |
| LWR14 | 0.525** | 0.453** | -0.728** | -0.424** |         |       |         |         |         |       |
| LWR15 | 0.477** | 0.585** | -0.348** | -0.692** | 0.657** |       |         |         |         |       |
| GT14  | 0.387** | 0.381** | 0.126    | 0.269**  | 0.144   | 0.053 |         |         |         |       |
| GT15  | 0.225*  | 0.452** | 0.109    | 0.235*   | 0.057   | 0.118 | 0.677** |         |         |       |
| TGW14 | 0.656** | 0.558** | 0.378**  | 0.415**  | 0.129   | 0.046 | 0.739** | 0.495** |         |       |
| TGW15 | 0.484** | 0.712** | 0.261**  | 0.450**  | 0.093   | 0.132 | 0.584** | 0.707** | 0.700** |       |

453 GL14, GL in 2014; GL15, GL in 2015; GW14, GW in 2014; GW15, GW in 2015; LWR14, LWR  
 454 in 2014; LWR15, LWR in 2015; GT14, GT in 2014; GT15, GT in 2015; TGW14, TGW in 2014;  
 455 TGW15, TGW in 2015.

456 \*, \*\* Significantly at  $P < 0.05$  and  $P < 0.01$ , respectively.

457

458 Table 2 QTLs detected for GL, GW, LWR, GT and TGW in the F<sub>2</sub> and F<sub>2,3</sub>

459 populations in year 2014 and 2015, respectively

| Trait | QTL            | Chr <sup>a)</sup> | Interval        | 2014 F <sub>2</sub> |                   |                   |                                  | 2015 F <sub>2,3</sub> |       |       |                    |
|-------|----------------|-------------------|-----------------|---------------------|-------------------|-------------------|----------------------------------|-----------------------|-------|-------|--------------------|
|       |                |                   |                 | LOD                 | Add <sup>b)</sup> | Dom <sup>c)</sup> | R <sup>2</sup> (%) <sup>d)</sup> | LOD                   | Add   | Dom   | R <sup>2</sup> (%) |
| GL    | <i>qGL1.1</i>  | 1                 | RM283-RM259     |                     |                   |                   |                                  | 3.68                  | 0.09  | -0.02 | 6.14               |
|       | <i>qGL1.2</i>  | 1                 | RM582-RM562     |                     |                   |                   |                                  | 3.04                  | 0.07  | -0.04 | 5.80               |
|       | <i>qGL3</i>    | 3                 | LRJ99-RM232     | 4.52                | -0.09             | -0.07             | 2.58                             | 8.26                  | -0.12 | -0.03 | 8.12               |
|       | <i>qGL4.1</i>  | 4                 | RM252-RM470     | 3.51                | -0.10             | -0.01             | 5.36                             |                       |       |       |                    |
|       | <i>qGL4.2</i>  | 4                 | RM470-RM349     |                     |                   |                   |                                  | 16.71                 | -0.20 | -0.02 | 25.39              |
|       | <i>qGL5.1</i>  | 5                 | RM516-RM3381    |                     |                   |                   |                                  | 3.34                  | 0.12  | 0.03  | 7.15               |
|       | <i>qGL5.2</i>  | 5                 | RM249-RM163     |                     |                   |                   |                                  | 4.28                  | 0.15  | 0.09  | 6.54               |
|       | <i>qGL6</i>    | 6                 | RM402-RM5963    | 5.29                | 0.10              | -0.08             | 13.71                            | 4.04                  | 0.07  | -0.06 | 7.41               |
|       | <i>qGL9</i>    | 9                 | RM566-YH16.8    |                     |                   |                   |                                  | 5.95                  | 0.13  | -0.03 | 12.69              |
|       | <i>qGL11</i>   | 11                | RM286-RM26085   |                     |                   |                   |                                  | 4.86                  | 0.09  | -0.02 | 7.86               |
| GW    | <i>qGW4</i>    | 4                 | RM349-RM567     |                     |                   |                   |                                  | 8.21                  | -0.05 | -0.01 | 13.97              |
|       | <i>qGW8</i>    | 8                 | RM126-RM515     |                     |                   |                   |                                  | 3.35                  | -0.03 | 0.00  | 6.96               |
|       | <i>qGW11</i>   | 11                | RM27181-RM224   |                     |                   |                   |                                  | 4.19                  | 0.03  | 0.01  | 4.58               |
|       | <i>qGW12.1</i> | 12                | RM511-RM313     |                     |                   |                   |                                  | 4.15                  | 0.03  | 0.01  | 5.11               |
|       | <i>qGW12.2</i> | 12                | RM309-RM3726    |                     |                   |                   |                                  | 4.67                  | 0.03  | 0.01  | 5.09               |
| LWR   | <i>qLWR2.1</i> | 2                 | RM7252-RM233    |                     |                   |                   |                                  | 3.95                  | 0.06  | 0.02  | 4.07               |
|       | <i>qLWR2.2</i> | 2                 | RM279-RM555     | 3.23                | 0.08              | 0.02              | 5.96                             |                       |       |       |                    |
|       | <i>qLWR3</i>   | 3                 | LRJ99-RM232     | 7.03                | -0.08             | -0.06             | 3.96                             | 9.57                  | -0.09 | -0.02 | 12.09              |
|       | <i>qLWR9</i>   | 9                 | RM566-YH16.8    | 5.13                | 0.08              | 0.03              | 8.02                             | 4.89                  | 0.07  | 0.03  | 10.00              |
|       | <i>qLWR11</i>  | 11                | RM27181-RM224   |                     |                   |                   |                                  | 5.23                  | -0.06 | -0.05 | 1.46               |
| GT    | <i>qGT2.1</i>  | 2                 | RM7252-RM233    |                     |                   |                   |                                  | 6.84                  | -0.02 | 0.02  | 11.73              |
|       | <i>qGT2.2</i>  | 2                 | RM327-RM263     |                     |                   |                   |                                  | 6.00                  | -0.03 | -0.01 | 11.16              |
|       | <i>qGT3</i>    | 3                 | LRJ99-RM232     | 16.94               | -0.04             | -0.02             | 15.16                            | 16.07                 | -0.04 | -0.01 | 20.98              |
|       | <i>qGT4.1</i>  | 4                 | RM6659-RM16616  | 4.31                | -0.02             | 0.01              | 7.99                             |                       |       |       |                    |
|       | <i>qGT4.2</i>  | 4                 | RM16653-RM16820 | 4.52                | -0.02             | 0.01              | 10.05                            |                       |       |       |                    |
|       | <i>qGT7</i>    | 7                 | RM560-RM234     | 4.95                | -0.02             | -0.00             | 6.60                             | 6.58                  | -0.02 | 0.00  | 10.25              |
|       | <i>qGT11</i>   | 11                | RM286-RM26085   | 3.00                | 0.01              | -0.01             | 5.83                             | 3.26                  | 0.01  | -0.01 | 6.24               |
| TGW   | <i>qTGW2.1</i> | 2                 | RM7252-RM233    |                     |                   |                   |                                  | 3.01                  | 0.00  | 0.63  | 3.01               |
|       | <i>qTGW2.2</i> | 2                 | RM327-RM263     |                     |                   |                   |                                  | 5.08                  | -0.68 | -0.13 | 8.28               |
|       | <i>qTGW3</i>   | 3                 | LRJ99-RM232     | 3.54                | -0.49             | -0.54             | 0.83                             | 7.60                  | -0.65 | -0.43 | 3.90               |
|       | <i>qTGW4</i>   | 4                 | RM470-RM349     | 5.08                | -0.83             | 0.46              | 15.76                            | 7.63                  | -0.83 | -0.12 | 12.03              |
|       | <i>qTGW6.1</i> | 6                 | RM402-RM5963    |                     |                   |                   |                                  | 4.47                  | 0.60  | -0.01 | 7.25               |
|       | <i>qTGW6.2</i> | 6                 | RM3183-RM20048  | 3.09                | 0.55              | -0.25             | 6.89                             | 6.26                  | 0.67  | 0.29  | 5.11               |
|       | <i>qTGW7.1</i> | 7                 | RM21242-RM542   |                     |                   |                   |                                  | 3.16                  | -0.40 | 0.29  | 5.76               |
|       | <i>qTGW7.2</i> | 7                 | RM455-RM234     |                     |                   |                   |                                  | 5.75                  | -0.62 | 0.50  | 12.83              |

*qTGW11* 11 RM286-RM26085 7.70 0.85 -0.58 20.68 6.22 0.68 -0.13 10.98

460 a) Chr, chromosome.

461 b) Add, additive effect of QTL: positive values indicate that alleles from Dodda increase the trait  
462 values, and negative values indicate that alleles from GZ63-4S increase the trait values.

463 c) Dom, dominant effect of QTL.

464 d)  $R^2$ , variation explained by QTL.

465

466 Table 3 Genetic effect of *qGS3* in the NIL population

|                                      | Number<br>of lines | GL (mm)     | GW (mm)   | LWR         | GT (mm)     | TGW (g)      |
|--------------------------------------|--------------------|-------------|-----------|-------------|-------------|--------------|
|                                      |                    | Mean±SE     | Mean±SE   | Mean±SE     | Mean±SE     | Mean±SE      |
| NIL( <i>qGS3<sup>Dodda</sup></i> )   | 21                 | 9.06±0.14 a | 2.77±0.05 | 3.31±0.08 a | 1.97±0.02 a | 24.10±0.96 a |
| NIL( <i>qGS3<sup>H</sup></i> )       | 40                 | 9.15±0.14 b | 2.77±0.06 | 3.33±0.07 a | 2.00±0.02 b | 24.88±1.10 b |
| NIL( <i>qGS3<sup>GZ63-4S</sup></i> ) | 19                 | 9.27±0.11 c | 2.75±0.01 | 3.41±0.05 b | 2.04±0.03 c | 25.57±1.08 c |

467 Lower-case letters indicate statistically significant ( $P<0.05$ ) differences between the mean values  
468 within each column (Duncan test).

469 NIL(*qGS3<sup>Dodda</sup>*) and NIL(*qGS3<sup>GZ63-4S</sup>*) are the lines carrying homozygous *qGS3* regions from  
470 Dodda and GZ63-4S in the NIL population, respectively, while NIL(*qGS3<sup>H</sup>*) is the line carrying  
471 heterozygous *qGS3* regions.

472

473 Table 4 Genetic effect of *qTGW6.2* in the NIL population

|                                         | Number<br>of lines | GL (mm)     | GW (mm)      | LWR       | GT (mm)   | TGW (g)      |
|-----------------------------------------|--------------------|-------------|--------------|-----------|-----------|--------------|
|                                         |                    | Mean±SE     | Mean±SE      | Mean±SE   | Mean±SE   | Mean±SE      |
| NIL( <i>qTGW6.2<sup>Dodda</sup></i> )   | 19                 | 9.64±0.11 b | 2.64±0.05 b  | 3.70±0.06 | 2.15±0.03 | 26.86±1.25 b |
| NIL( <i>qTGW6.2<sup>H</sup></i> )       | 34                 | 9.55±0.11 a | 2.61±0.06 a  | 3.71±0.08 | 2.14±0.03 | 25.96±1.10 a |
| NIL( <i>qTGW6.2<sup>GZ63-4S</sup></i> ) | 18                 | 9.50±0.11 a | 2.61±0.04 ab | 3.69±0.07 | 2.14±0.03 | 25.62±1.08 a |

474 Lower-case letters indicate statistically significant ( $P<0.05$ ) differences between the mean values  
475 within each column (Duncan test).

476 NIL(*qTGW6.2<sup>Dodda</sup>*) and NIL(*qTGW6.2<sup>GZ63-4S</sup>*) are the lines carrying homozygous *qTGW6.2*  
477 regions from Dodda and GZ63-4S in the NIL population, respectively, while NIL(*qTGW6.2<sup>H</sup>*) is  
478 the line carrying heterozygous *qTGW6.2* regions.

479

480 Table 5 Genetic effect of *qGT7* in the NIL population

|                                      | Number   | GL (mm)   | GW (mm)   | LWR          | GT (mm)     | TGW (g)      |
|--------------------------------------|----------|-----------|-----------|--------------|-------------|--------------|
|                                      | of lines | Mean±SE   | Mean±SE   | Mean±SE      | Mean±SE     | Mean±SE      |
| NIL( <i>qGT7<sup>Dodda</sup></i> )   | 14       | 9.66±0.12 | 2.57±0.06 | 3.81±0.10 b  | 1.96±0.03 a | 21.84±1.20 a |
| NIL( <i>qGT7<sup>H</sup></i> )       | 21       | 9.62±0.14 | 2.61±0.08 | 3.74±0.08 a  | 1.99±0.03 b | 22.81±1.19 b |
| NIL( <i>qGT7<sup>GZ63-4S</sup></i> ) | 13       | 9.60±0.13 | 2.60±0.06 | 3.76±0.07 ab | 2.03±0.03 c | 23.17±1.05 b |

481 Lower-case letters indicate statistically significant ( $P<0.05$ ) differences between the mean values  
482 within each column (Duncan test).

483 NIL(*qGT7<sup>Dodda</sup>*) and NIL(*qGT7<sup>GZ63-4S</sup>*) are the lines carrying homozygous *qGT7* regions from  
484 Dodda and GZ63-4S in the NIL population, respectively, while NIL(*qGT7<sup>H</sup>*) is the line carrying  
485 heterozygous *qGT7* regions.

486

#### 487 **Figure legends**

488 Fig. 1 Schematic representation of the experimental design.

489

490 Fig. 2 Frequency distribution of the  $F_2$  and  $F_{2:3}$  populations for GL, GW, LWR, GT  
491 and TGW in year 2014 and 2015.

492 Arrow indicates the value of Dodda.

493

494 Fig. 3 Distribution of putative QTLs for GL, GW, LWR, GT and TGW identified in  
495 the  $F_2$  and  $F_{2:3}$  populations on the linkage map.

496 GL14, QTLs for GL detected in the  $F_2$  population in year 2014; GL15, QTLs for GL detected in  
497 the  $F_{2:3}$  population in year 2014. The QTLs for GW, LWR, GT and TGW are represented as the  
498 same manner as that for GL.



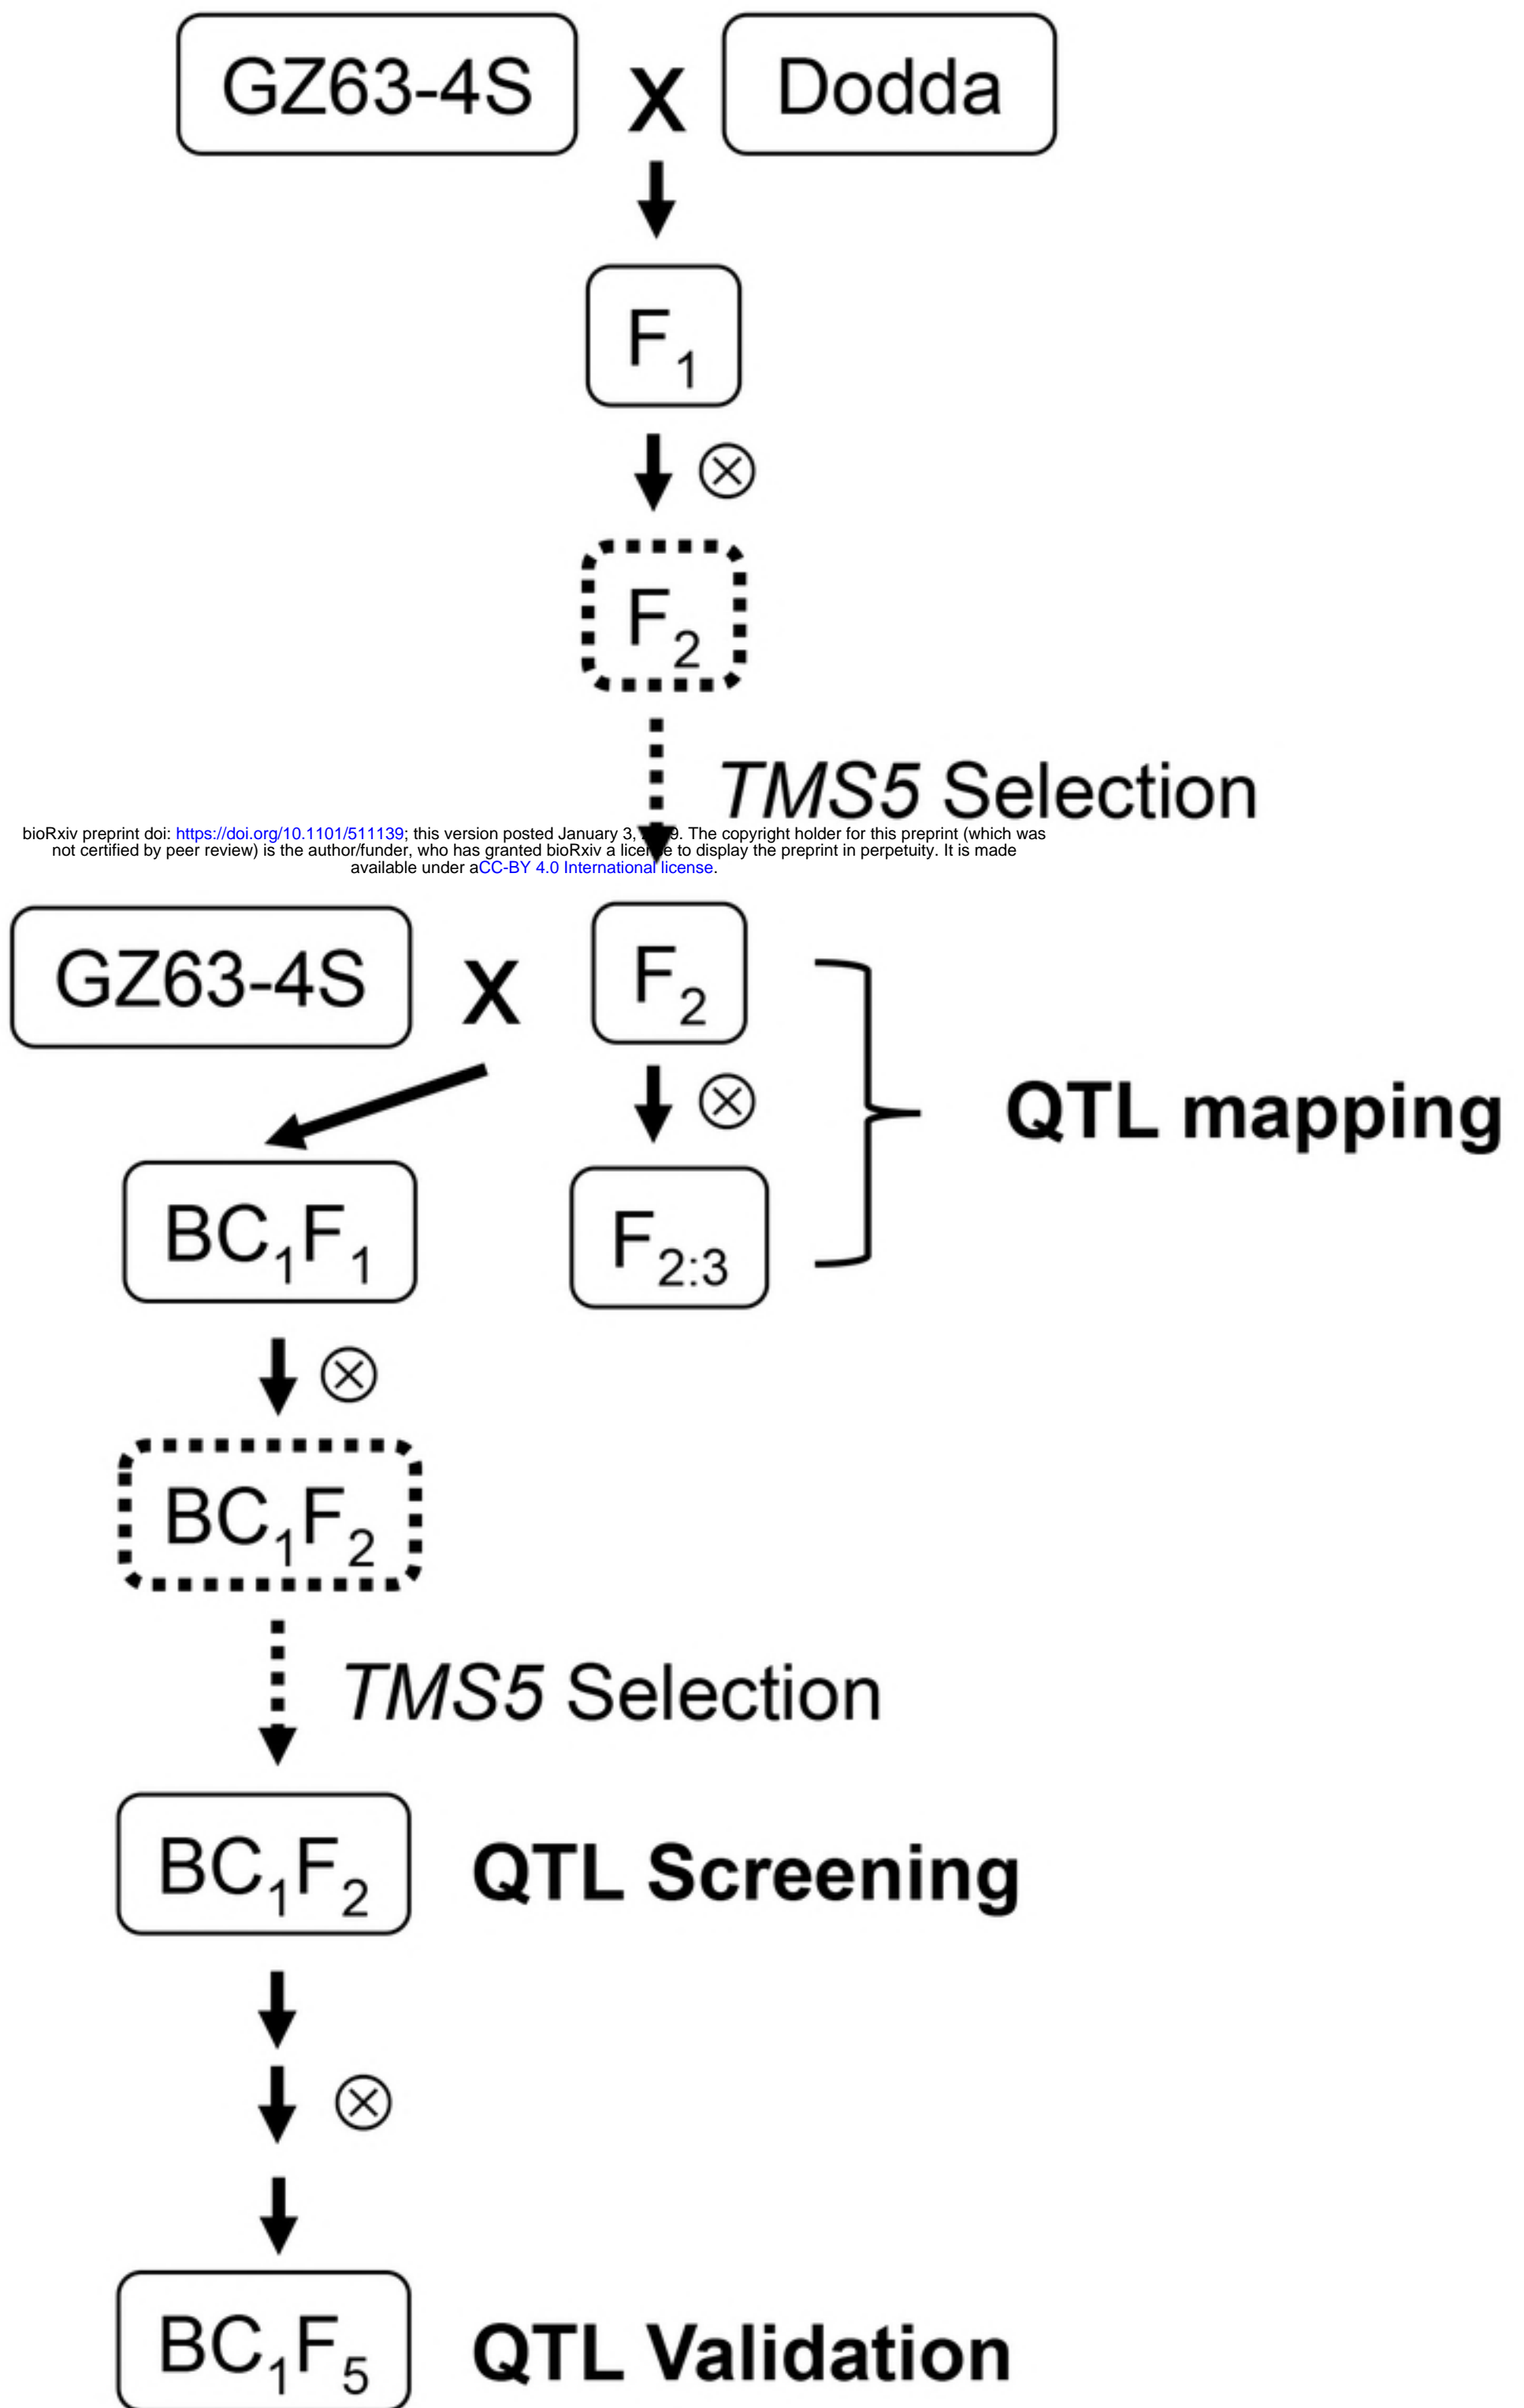

Figure 1

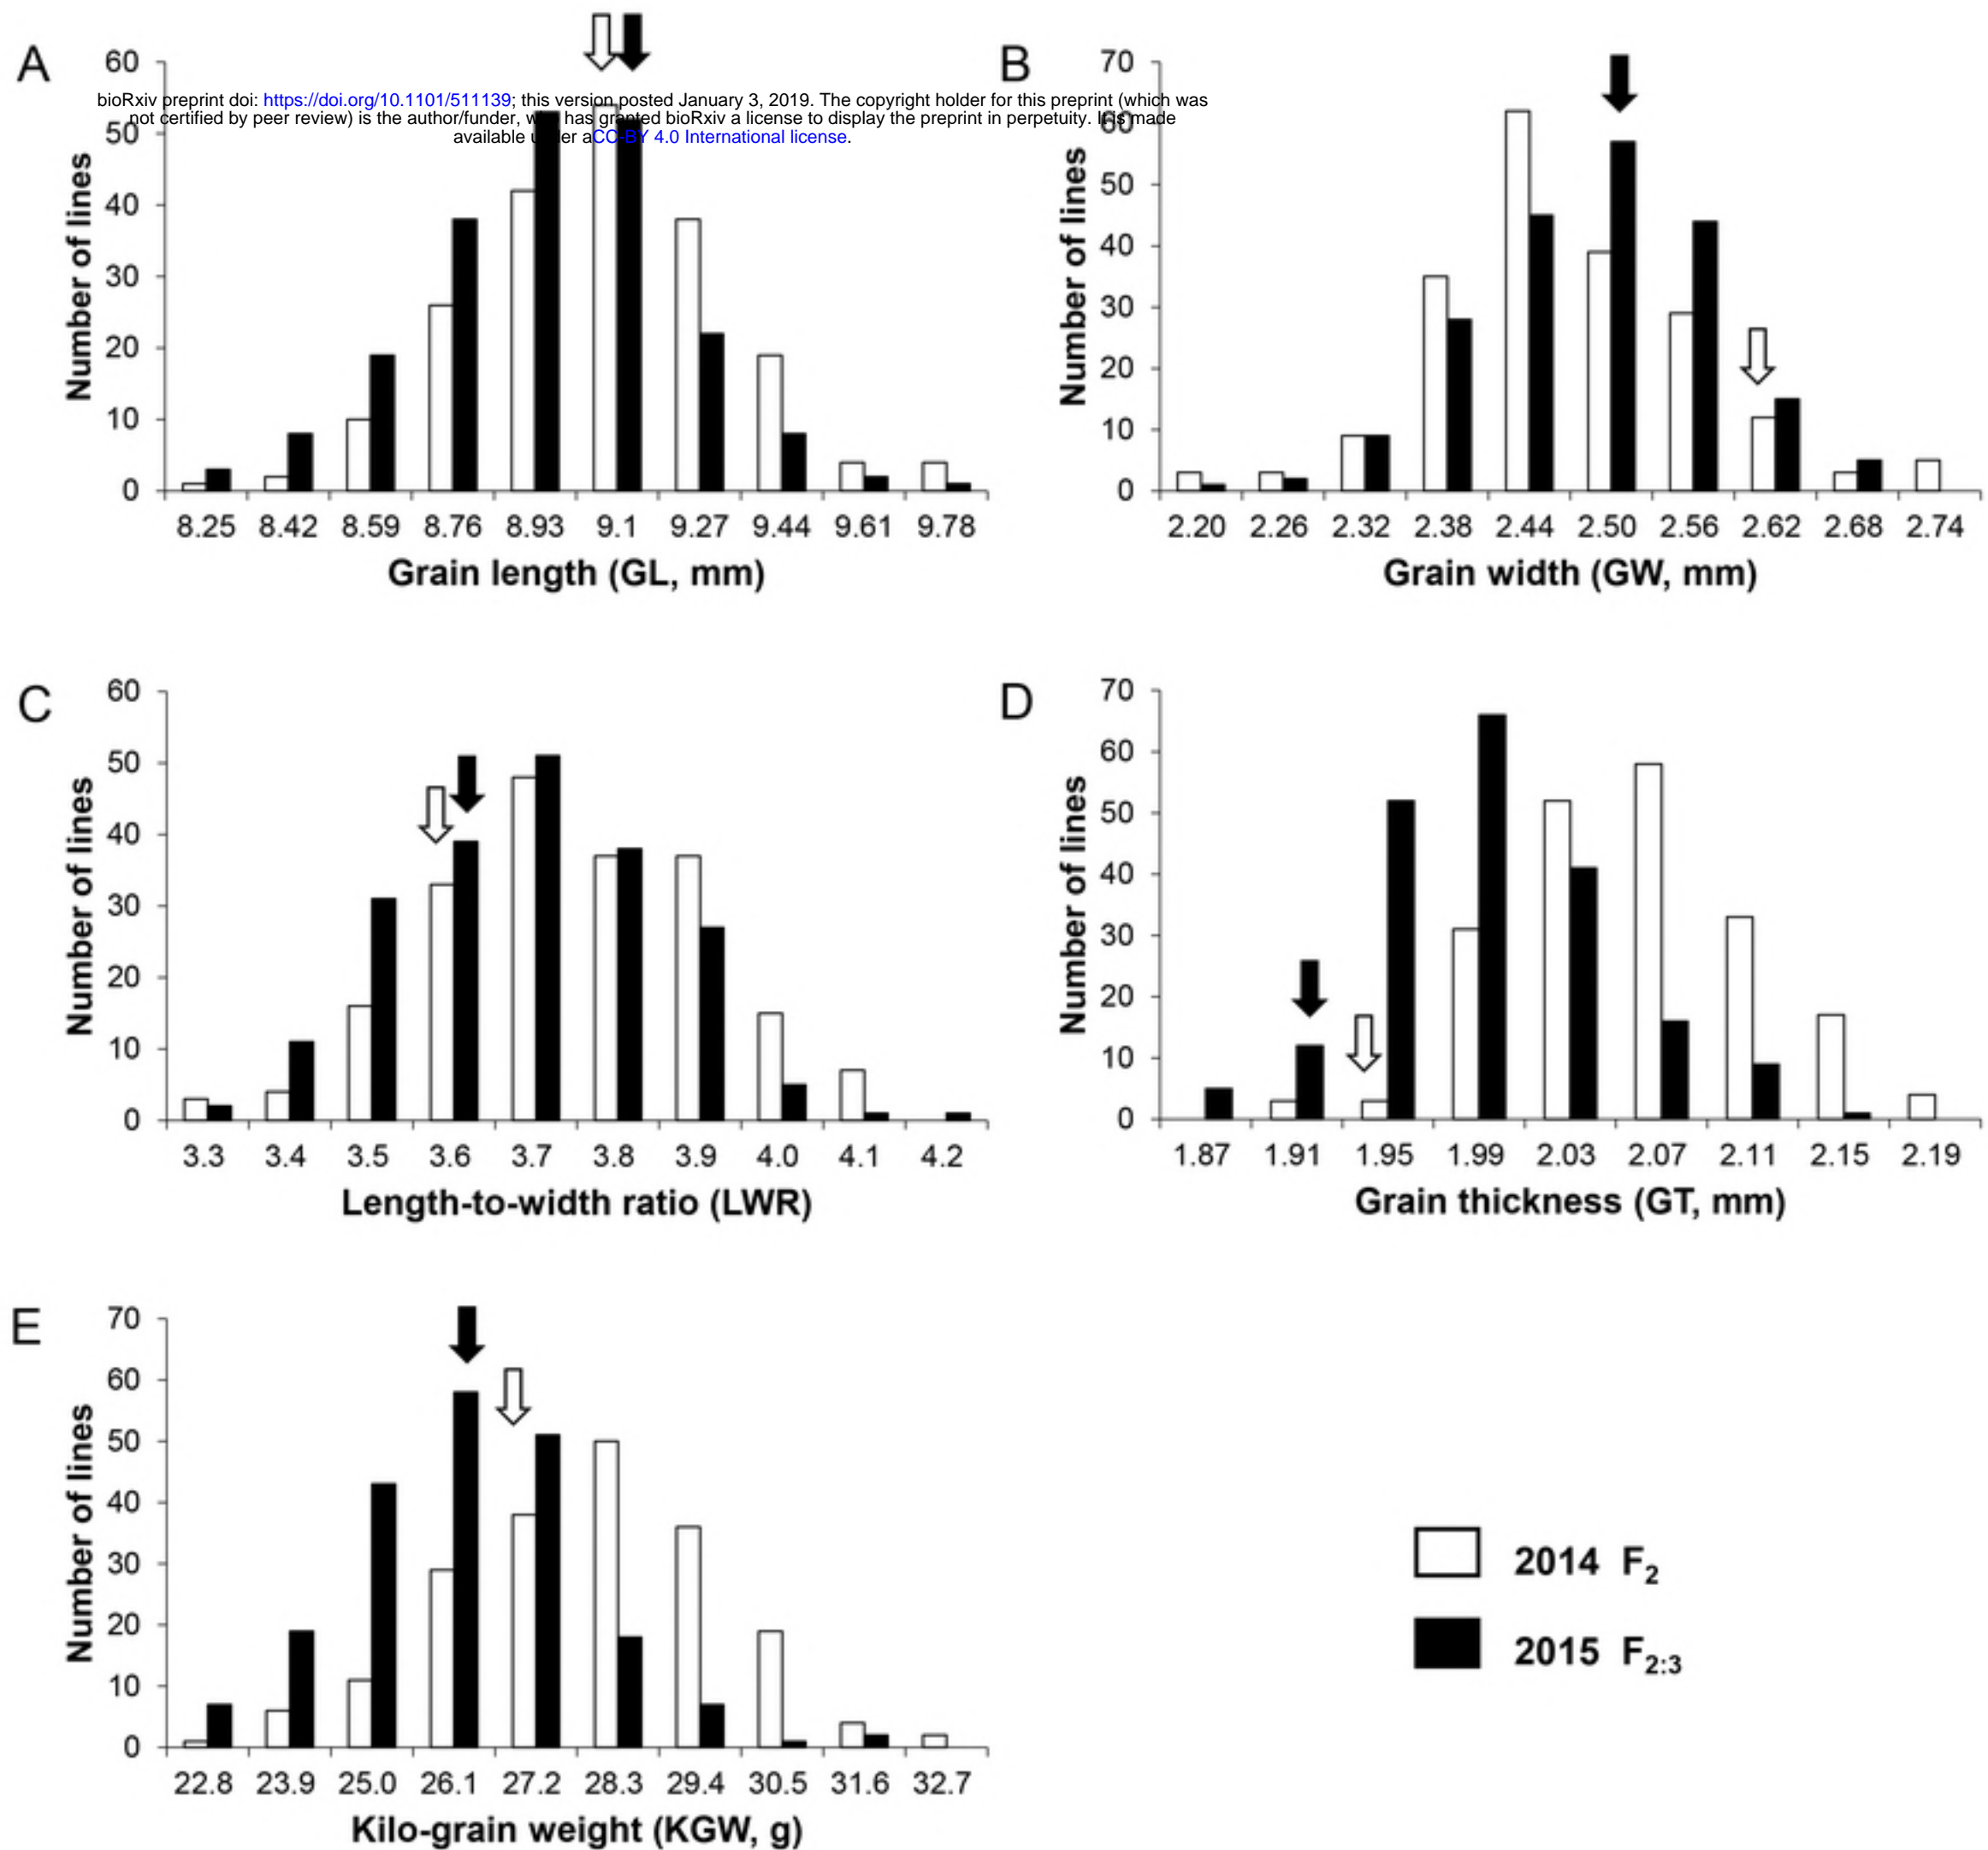

Figure 2

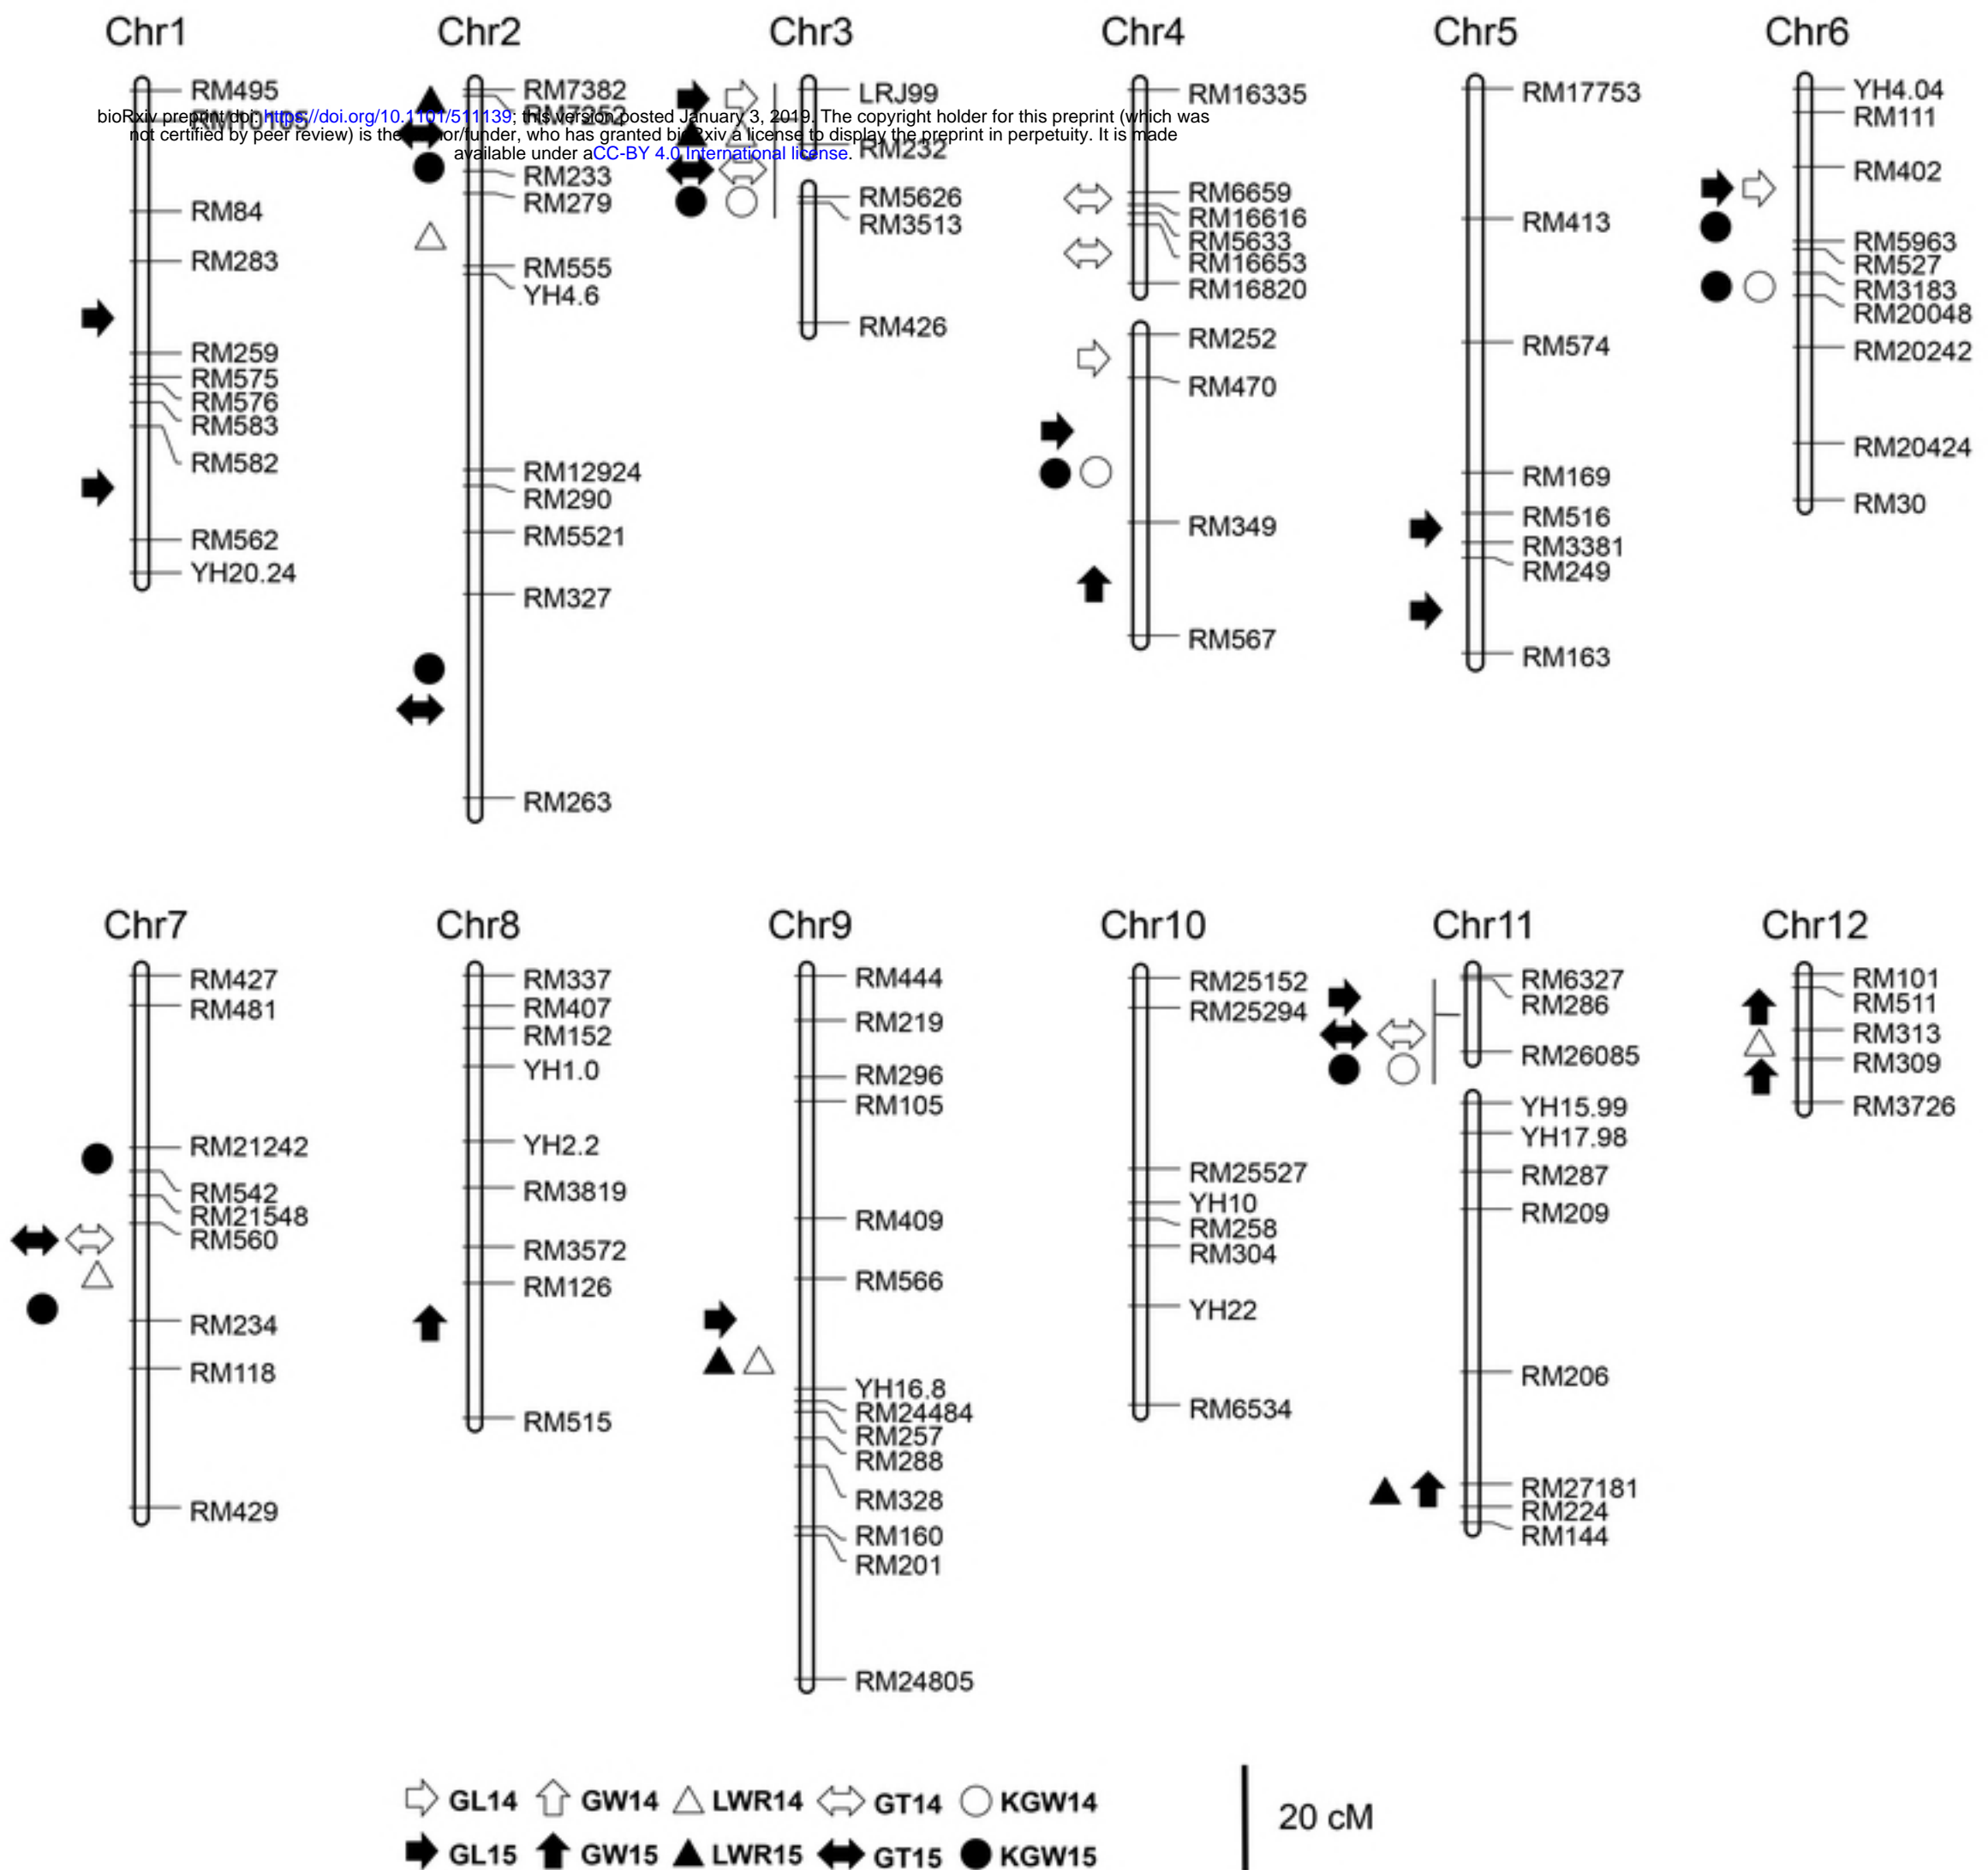

Figure 3
